# 1 Transcriptomic Response of Postprandial Blood, Subcutaneous Adipose Tissue 2 and Muscle to a combined lifestyle intervention in older adults

3 F.A. Bogaards<sup>1,2,3</sup>, T. Gehrman<sup>1,2</sup>, M. Beekman<sup>1</sup>, N. Lakenberg<sup>1</sup>, E. Suchiman<sup>1</sup>, C.P.G.M. de  
4 Groot<sup>3</sup>, M.J.T. Reinders<sup>2,4</sup> and P.E. Slagboom<sup>1, 4,5</sup>

5 <sup>1</sup>*Molecular Epidemiology, Leiden University Medical Center, Leiden, The Netherlands,* <sup>2</sup>*Leiden*  
6 *Computational Biology Center, Leiden, The Netherlands,* <sup>3</sup>*Human Nutrition and Health,*  
7 *Wageningen University & Research, Division of Human Nutrition, Wageningen, The*  
8 *Netherlands,* <sup>4</sup>*Delft Bioinformatics Lab, Delft University of Technology, Delft, The*  
9 *Netherlands.* <sup>5</sup>*Max Planck Institute for Biology of Aging, Cologne, Germany.*

## 10 Abstract

11 Molecular effects of lifestyle interventions are typically studied in a single tissue. Here, we  
12 investigated the sex-specific effects of the Growing Old TOgether (GOTO) study, a moderate  
13 13-week combined lifestyle intervention on the transcriptomes of postprandial blood,  
14 subcutaneous adipose tissue (SAT) and muscle tissue in healthy older adults, the overlap in  
15 effect between tissues and their relation to whole-body parameters of metabolic health. The  
16 GOTO intervention had virtually no effect on the postprandial blood transcriptome, while the  
17 SAT and muscle transcriptomes responded significantly. In SAT, pathways involved in HDL  
18 remodeling, O<sub>2</sub>/CO<sub>2</sub> exchange and signaling were overrepresented, while in muscle, collagen  
19 and extracellular matrix pathways were significantly overexpressed. Additionally, we found  
20 that the effects of the SAT transcriptome closest associated with gains in metabolic health.  
21 Lastly, in males, we identified a shared variation between the transcriptomes of the three  
22 tissues. We conclude that the GOTO intervention had a significant effect on metabolic and  
23 muscle fibre pathways in the SAT and muscle transcriptome, respectively. Aligning the

NOTE: This preprint reports new research that has not been certified by peer review and should not be used to guide clinical practice.

24 response in the three tissues revealed a blood transcriptome component which may act as an  
25 integrated health marker for metabolic intervention effects across tissues.

## 26 Main

27 Worldwide, the proportion of older people in our society is increasing, and with it the burden  
28 of age-related diseases on the quality of life and health economics <sup>1,2</sup>. Improving metabolic  
29 health is considered key to improving vitality at older ages <sup>3,4</sup>. Dietary, activity-based, or  
30 combined lifestyle interventions are known to improve culprit factors in human ageing such  
31 as metabolic health and immunity. Although effects are usually heterogeneous, the metabolic  
32 health can significantly be improved, even in middle and older age <sup>5–10</sup>.

33 The effect of lifestyle interventions can be studied by traditional blood-based markers  
34 of metabolic health (including: BMI, fasting insulin, systolic blood pressure (SBP), HDL  
35 cholesterol, diastolic blood pressure (DBP), dual-energy X-ray absorptiometry (DEXA)-based  
36 whole-body fat%, trunk fat%) <sup>6,11</sup> and a range of omics based assays such as the metabolome  
37 <sup>6,12–14</sup>, proteome <sup>15,16</sup>, epigenome <sup>8</sup> and the transcriptome <sup>17–27</sup>, of blood <sup>6,12–17,20,28,29</sup>, gut <sup>15</sup>,  
38 adipose tissue <sup>18,21,26,30,31</sup>, and muscle tissue <sup>19,22,23,27</sup>. Human intervention studies are usually  
39 small (n = 120 – 250) <sup>6,29,32–34</sup> and focus on one tissue only, mainly blood. Mostly, a strong  
40 effect is observed on the fasting blood proteome <sup>16</sup> and metabolome <sup>6</sup>, but typically not on  
41 the fasting transcriptome, where the effects are milder and more variable <sup>17,24,35</sup>, except for  
42 rigorous lifestyle interventions <sup>29</sup>. The transcriptomes of adipose tissue and muscle do react  
43 respectively on separate dietary <sup>25</sup> and physical activity <sup>19,22,23,27</sup> lifestyle interventions. In  
44 mice, combined lifestyle interventions were shown to affect the transcriptome of brown  
45 adipose tissue and skeletal muscle <sup>36</sup>.

46 In humans, however, the simultaneous effect of combined lifestyle interventions on  
47 the transcriptome of blood, subcutaneous adipose tissue (SAT) and muscle was not  
48 investigated as yet. To understand how differences in omics profiles relate to changes over  
49 the years in health parameters one often relies on population-based omics studies. However,  
50 such studies mainly rely on blood samples<sup>37,38</sup>. We speculate that some of the transcriptomic  
51 changes in different tissues in response to interventions align due to the systemic nature of  
52 lifestyle interventions and that a part of changes in the blood transcriptome reflect responses  
53 in SAT and muscle and related health gains. Hereto, an integrative analysis of the SAT, muscle  
54 and blood transcriptomic response to such intervention is necessary.

55 Integrative data analysis methods pool data from different datasets to jointly analyze  
56 them<sup>39</sup>. Joint and Independent Variation Explained (JIVE)<sup>40</sup> is one such integrative data  
57 analysis method. JIVE decomposes the variation across the different datasets in three  
58 components: 1) the joint variation between the datasets, 2) dataset-specific variations, and  
59 3) the residual noise for each dataset separately. The blood transcriptome response in mild  
60 interventions is usually minimal, JIVE however may reveal a part that represents the joint  
61 response variation across tissues. We are interested whether the joint response captures the  
62 intervention effects on metabolic health stronger than the blood transcriptome alone.

63 We applied the tissue-specific as well as the integrative data analysis approach on a  
64 13-week combined physical activity and dietary lifestyle intervention study in older adults;  
65 the Growing Old TOgether (GOTO) study. Within this study the transcriptome of postprandial  
66 blood, SAT and muscle tissue before and after intervention has been measured. We report on  
67 genes whose expressions within each of the different tissues associated with whole body  
68 health improvements across the intervention, and report on the observed joint  
69 transcriptional effect. We conclude that especially the SAT and muscle transcriptome respond

70 to the intervention by HDL remodeling, cell signaling and CO<sub>2</sub>/O<sub>2</sub> exchange for SAT, and  
71 collagen/extracellular matrix pathways for muscle. Especially the SAT transcriptome in both  
72 sexes associates to beneficial changes in whole-body composition. The blood transcriptome  
73 does not generally respond to intervention or reflect health gain. Our integrative analysis of  
74 blood, however, revealed that the joint effect of the three tissues associated with the  
75 parameters of whole-body composition parameters. This blood transcriptome component  
76 may act as an integrated health marker for metabolic intervention effects across tissues.

## 77 Results

78 *Health markers improve but improvement varies among subsets*

79 Participants compliant to the intervention overall improved their metabolic health (Table 1)  
80 with for some parameters slight sex-differences in magnitude of effect. We have  
81 transcriptome data available in subsets of the complete GOTO study group: 1) Overlapping  
82 Blood, SAT and Muscle 57, which consists of 33 males and 24 females, 2) Blood Postprandial  
83 Samples 88, which contain 45 males and 43 females, 3) SAT Postprandial samples 78, which  
84 contains 38 males and 40 females, and 4) Muscle Postprandial samples 82, which contains,  
85 48 males and 34 females. The direction of effect on the health parameters in the subsets of  
86 participants for which data in different tissues is available was similar (Table 1), though there  
87 were some differences in significance level. For example, in males, the intervention only had  
88 a significant effect on HDL cholesterol in the group with muscle transcriptome measurements.  
89 While in females, HDL cholesterol size was significantly different in only the participants with  
90 SAT transcriptome measurements, and the FRS was significantly different in the complete set  
91 of measurements. These differences in effect could be partially explained by slight baseline  
92 classical metabolic health marker level differences between the groups (Supplementary Table

93 1). To circumvent the slight differences in intervention effect on the classical metabolic health  
94 markers between the different groups, the associations between the transcriptome and the  
95 classical metabolic health markers will be only be calculated on the overlapping postprandial  
96 blood, SAT and muscle samples.

97 *Strong sex-dependent transcriptional response in subcutaneous adipose tissue and*  
98 *muscle.*

99 We investigated the effect of the GOTO intervention by measuring transcriptional differences  
100 in blood, SAT and muscle (differential gene expression analysis, see Materials and Methods).  
101 In males, the number of significantly differentially expressed genes (DEGs) across the  
102 intervention varied considerably between blood (one), SAT (89), and muscle (251) (Figure 1,  
103 Table 2, Supplementary Table 2, 3 & 4). The ratio between up and down regulated DEGs also  
104 differed between the affected tissues: a slightly larger number of downregulated genes in SAT  
105 whereas over 80% of the DEGs were upregulated in muscle. Noteworthy, the muscle DEGs  
106 contained 14 collagen genes, all of which were upregulated (Supplementary Table 4).

107 For females, the number of DEGs across the different tissues were somewhat similar  
108 as in males, but the effect sizes were smaller (Figure 1, Table 2): zero DEGs in blood, 168 in  
109 SAT, and 168 in muscle (Supplementary Table 5 & 6). Like the male samples, more than half  
110 of the DEGs in SAT were downregulated, while in muscle over two-thirds of significant DEGs  
111 were upregulated. The female muscle DEGs contained 7 collagen genes, all of them  
112 upregulated (Supplementary Table 6).

113 Overall, in both males and females, the intervention had hardly any effect on the blood  
114 transcriptome while in SAT both up- and downregulated genes were observed, whereas in  
115 muscle the majority of the DEGs were upregulated.

116 *Lipid and collagen related pathways enriched in SAT and muscle response, respectively*

117 We then investigated which pathways were associated with the found DEGs (pathway  
118 overrepresentation analysis, see Materials and Methods). In male SAT, five pathways were  
119 significantly overrepresented (Figure 2, Supplementary Table 7). The three upregulated  
120 pathways were involved with HDL remodeling, nuclear receptor signaling and cholesterol  
121 transport, while the downregulated pathway was involved in fertilization, the remaining  
122 pathway (equally down -and upregulated) was involved in ligand clearance. In male muscle,  
123 all 18 enriched pathways were upregulated. The majority of these were involved in collagen  
124 formation or extracellular matrix formation/degradation (Figure 2, Supplementary Table 7).  
125 The remaining pathways were involved in myogenesis (NCAM1 pathways), mesenchymal  
126 stem cell differentiation (PDGF pathway), scavenger receptors (binding and uptake, class A  
127 receptors) and protein O-glycosylation.

128 In female SAT, seven pathways were significantly overrepresented (Figure 2,  
129 Supplementary Table 7). The three upregulated pathways were involved in signaling  
130 pathways and HDL remodeling. The four downregulated pathways were related to MAPK  
131 signaling and CO<sub>2</sub>/O<sub>2</sub> exchange. However, the three CO<sub>2</sub>/O<sub>2</sub> pathways were only  
132 overrepresented due to the same three genes (Supplementary Table 7). In female muscle, all  
133 eight overrepresented pathways were upregulated (Figure 2, Supplementary Table 7), six of  
134 which were involved in collagen formation and extracellular matrix organization/degradation.  
135 The remaining pathways were involved in in netrin-1 signaling and osteoblast differentiation.

136 Taken together, both in males and females, the overrepresented pathways in muscle  
137 were largely involved in collagen and extracellular matrix remodeling. In SAT, there were  
138 fewer enriched pathways which were less consistent in terms of direction (both -up and

139 downregulated). The overrepresented pathways in SAT were involved in signaling, O<sub>2</sub>/CO<sub>2</sub>  
140 exchange, HDL remodeling and cellular signaling.

141 *Response of tissue-specific DEGs reproduced across SAT and muscle, not in blood*

142 Next, we questioned whether there was a transcription response common to the three  
143 tissues. Hereto, we examined the response of the eigengene of a set of tissue-specific DEGs  
144 in the other tissues (see Materials and Methods). For example, the eigengene of the male-  
145 upregulated DEGs in SAT tissue was also positively upregulated in muscle, whereas it was non-  
146 significantly downregulated in blood (second row in Figure 3). Similarly, in females, we noted  
147 correspondence between SAT and muscle, although the eigengene of the upregulated DEGs  
148 in SAT was stronger than in males, in blood the effect was less significant (sixth row, Figure  
149 3). Since there was only one significant DEG in postprandial blood (Figure 1, Table 2), no blood  
150 down- or upregulated DEGs eigengenes were calculated.

151 In general, we noted a similar behavior of the male/female eigengenes across the  
152 tissues (Figure 3). Remarkably, the eigengene of SAT-downregulated DEGs was upregulated  
153 in muscle (in both male and female) and the eigengene of muscle-upregulated DEGs was  
154 downregulated in SAT (although not significantly). Furthermore, the effect of the muscle and  
155 SAT eigengenes of DEGs were not significantly changed in blood, suggesting that these  
156 SAT/muscle genes were not affected by the intervention in blood. In summary, when  
157 investigating the intervention effect of the genes strongest affected by the intervention, no  
158 overlap of transcriptional response was observed between blood and SAT or muscle.  
159 Relationships did exist within the transcriptional response between SAT and muscle, although  
160 not always consistent in direction of effect.

161 *Especially SAT- and muscle-specific DEGs associate with health markers*

162 To better understand the differential expressed transcriptome, we calculated the association  
163 between the eigengene values and the change in ten clinical metabolic health markers: *I*) two  
164 DEXA scan body composition measurements: whole-body fat%, trunk fat%; *II*) seven  
165 traditional metabolic health markers: BMI, Waist Circumference (WC) fasting insulin, fasting  
166 HDL cholesterol, fasting HDL cholesterol size, SBP, DBP; and *III*) the Framingham Risk Score  
167 (FRS), which is a cardiovascular risk score (Figure 4). Since the intervention effects on some of  
168 the health markers differed between the subgroups (Table 1), which thus can cause  
169 differences in effects due to differences in subsets, the relation between the expression data  
170 and metabolic health markers was performed on the overlapping blood, SAT and muscle  
171 samples (57; 33 males, 24 females). In blood, there were no significant associations between  
172 any of the eigengenes and classical metabolic health markers. The SAT eigengenes were  
173 significantly associated to the change in DEXA body composition parameters (whole-body  
174 fat%, trunk fat%), four of the seven traditional metabolic health markers (BMI, WC and fasting  
175 HDL cholesterol size) in the SAT transcriptome of both sexes, and with the fasting HDL  
176 cholesterol level and FRS only in men. Interestingly, also the muscle eigengenes expressed in  
177 SAT were significantly associated to the change in all of these parameters in men, except for  
178 fasting HDL cholesterol level, with the downregulated muscle eigengenes showing the  
179 strongest associations overall. In the transcriptome of muscle, the downregulated SAT  
180 eigengene associated negatively to DBP and the downregulated muscle eigengene associated  
181 to the change in DEXA body composition markers; whole-body fat%, trunk fat%, and  
182 metabolic health markers; BMI in men, BMI and WC in women.

183 Taken together, especially in the SAT transcriptome, the SAT and muscle eigengenes  
184 reflected changes in DEXA body composition markers (whole-body and trunk fat%) and



185 classical metabolic health markers (BMI, WC, fasting HDL cholesterol level and size), and to  
186 the former four also did the downregulated muscle eigengene in the muscle transcriptome.  
187 Many effects were similar in males and females, although more pronounced in males.

188 *Integrated analysis reveals male postprandial blood, SAT and muscle transcriptome*  
189 *share a joint variation*

190 To explore the tissue dependency in a more intricate way, we captured the joint  
191 transcriptional reaction to the intervention across the three different tissues using Joint and  
192 Individual Variation Explained (JIVE) analysis (Materials and Methods, Supplementary Figure  
193 1). The joint representation is a linear subspace spanned by the genes, analogous to a  
194 principal component analysis (PCA), but that now also explains the joint variation in  
195 expression in all three tissues across the intervention (Materials and Methods). Hence,  
196 although informed by all three tissues, the blood expression of a participant (before and after  
197 the intervention) can be mapped to this joint subspace without needing information about  
198 the muscle or SAT transcriptome. In other words, the blood transcriptome of a participant is  
199 decomposed in three (independent) transcriptome terms: 1) a term that reflects the joint  
200 transcriptomic variation in blood, SAT and muscle, 2) a term reflecting the remaining  
201 structured variation in blood only (also referred to as the individual variation), and 3) a term  
202 that represents the residual noise in the blood transcriptome, i.e. the signal that is not  
203 explained by the joint and individual terms. Subsequently, we can measure the differential  
204 expression across the intervention in either the joint subspace (of blood, SAT and muscle) or  
205 the individual subspaces (for each tissue types). The number of joint and individual  
206 components are determined through permutation testing (Materials and Methods).

207 In the male samples, JIVE identified 2 joint components for the shared transcriptomic  
208 variation in blood, SAT and muscle, and 11, 15 and 15 individual components for the blood,

209 SAT and muscle, respectively (Supplementary Table 8). In postprandial blood and SAT, the  
210 joint components together explained 8% and 7.2% of the total variation in those tissues,  
211 respectively. In the postprandial muscle transcriptome, both joint components explained  
212 31.3% of the variation. In female samples, JIVE did not identify a joint term that was  
213 independent from the individual terms (Supplementary Figure 2).

214 *In male samples, the drivers of the joint components were involved in phospholipid*  
215 *metabolism and the immune system*

216 To investigate what genes expressed in postprandial blood were the drivers of the joint effect,  
217 the 250 genes that had the largest loading factors for each of the two joint components were  
218 selected, respectively (Materials and Methods). Both sets of genes were subsequently used  
219 in a pathway enrichment analysis. In postprandial blood, the genes driving the first joint  
220 component (JC1) that explains most of the joint variance across the tissues were involved  
221 phospholipid metabolism, while the genes driving the second joint component (JC2) were  
222 involved in interferon signaling, inflammation and other aspects of the immune system  
223 (Figure 5).

224 *Phospholipid metabolism genes that drive the joint effect also capture the intervention*  
225 *effect individually*

226 Next we wondered whether the genes driving the significant effects of JC1 and JC2 also  
227 showed an intervention effect by themselves. Within the both sets of 250 genes that had the  
228 highest loading factors for each of the joint components, we selected those genes that  
229 overlapped with the found enriched pathways. Interestingly, we found a remarkable  
230 difference between the intervention effect of the genes involved in phospholipid metabolism  
231 and those involved in immunity (Figure 6): the joint effect of the genes involved in

232 phospholipid metabolism was more strongly influenced by the intervention than the  
233 individual effect, however, neither effect crossed the significant threshold after adjustment  
234 for multiple testing (Figure 6). Compared to the phospholipid metabolism genes, the effect  
235 sizes in both the joint nor individual effect of genes involved in the immune system were  
236 considerably weaker. These effects were also non-significantly associated with the  
237 intervention effect.

238 *Immune genes that relate to the joint effect capture metabolic health effects of the*  
239 *intervention*

240 Next we investigated whether changes in the genes involved in phospholipid metabolism  
241 and immunity associated with changes in the metabolic health markers. Here we found that  
242 neither the joint nor individual effect of the phospholipid genes associated to these health  
243 marker effects (Figure 6). In contrast, the joint effect of the genes involved in the immune  
244 system did strongly associate with markers of body composition (whole-body and trunk  
245 fat%) while, except for RAB44 and RAPGEF3 (which was associated to the fasting HDL  
246 cholesterol level), the individual effect did not. Hence, it is possible to detect effects of the  
247 intervention in the postprandial blood transcriptome, but only when the individual blood  
248 effect has been removed.

249 *Variance in the muscle and SAT transcriptome explain the selection of contributing*  
250 *genes to the joint components of blood differently*

251 To investigate which of the two tissues, SAT or muscle, correlated most with the joint  
252 components in blood, we calculated the correlations of the top 250 genes with the highest  
253 loading factors for each of the joint components (JC1 and JC2) in blood with those in muscle  
254 and SAT (Supplementary Figure 3). The JC1 blood genes showed increasingly higher absolute

255 correlations with the JC1 and JC2 muscle genes, whereas the JC2 blood genes showed an  
256 opposite behavior and were merely not correlated with the JC1 or JC2 muscle genes. On the  
257 other hand, the JC1 and JC2 SAT genes showed a more strong absolute correlation with the  
258 JC2 blood genes as opposed to the JC1 blood genes. These results indicate that the JC1 blood  
259 genes (dominated by genes involved in phospholipid metabolism) are largely correlated with  
260 the variance in the muscle transcriptome, the JC2 blood genes (dominated by genes involved  
261 in the immune system) are more correlated with the variances in the SAT transcriptome.

## 262 Discussion

263 We investigated the effects in men and women of a mild combined lifestyle intervention in  
264 older adults on the postprandial transcriptome of blood, subcutaneous adipose tissue (SAT)  
265 and muscle tissue, and related the response to changes in parameters of metabolic health.  
266 Furthermore, using JIVE, we explored the shared variation between the three transcriptomes.  
267 In both sexes, the 13-week combined lifestyle intervention had virtually no effect on the  
268 postprandial blood transcriptome, while the postprandial SAT and muscle transcriptomes  
269 responded significantly. In postprandial SAT, pathways involved in HDL remodeling, cell  
270 signaling and CO<sub>2</sub>/O<sub>2</sub> exchange (both sexes), ligand binding by scavenger receptors,  
271 NR1H3/NR1H2 cholesterol related gene expression and fertilization (male only), and signal  
272 transduction and MAPK signaling cascades (female only) were overrepresented, while in the  
273 postprandial muscle, pathways involved in collagen, extracellular matrix remodeling, protein  
274 O-glycosylation (male only) and osteoblast differentiation (female only) were significantly  
275 overexpressed.

276 The response of the SAT transcriptome in both sexes associated most strongly with  
277 changes in the Framing Risk Score (FRS), and metabolic health, including HDL cholesterol level

278 and size, and specifically in body composition markers (whole-body and trunk fat%, BMI and  
279 Waist Circumference (WC)), and so did a part of the changes in the muscle transcriptome  
280 (whole-body and trunk fat%, BMI, WC and diastolic blood pressure (DBP)). We did observe  
281 sex differences in the association effect sizes. Lastly, we identified shared variation between  
282 the three transcriptomes, but only in the tissues of men. We identified in the blood  
283 transcriptome a joint intervention effect dominated by genes involved in phospholipid  
284 metabolism, largely influenced by genes overlapping with changes in the muscle  
285 transcriptome, and a second joint intervention effect dominated by genes involved in the  
286 immune system, overlapping with changes in the SAT transcriptome. The latter associated  
287 with changes in body composition (whole-body and trunk fat%). These effects were not  
288 detected in the original transcriptome of postprandial blood.

289 The effect of lifestyle interventions on the human transcriptome has mainly been  
290 reported for dietary and physical activity regimes separately, typically in metabolically  
291 unhealthy or frail participants <sup>22,24–26,30</sup>. This makes a direct comparison with the response of  
292 the healthy, non-diabetic, older adults <sup>6</sup> to the GOTO combined lifestyle intervention difficult.  
293 Nevertheless, we do find similarities to dietary interventions. Like in GOTO, nutritional  
294 interventions with a mild energy restriction (20-25%, for 4-12 weeks) hardly affected the  
295 blood transcriptome <sup>24</sup>. In adipose tissue, caloric restriction interventions changed the  
296 expression of genes involved in glucose and lipid metabolism, signal transduction, stem cell  
297 maintenance and vascularization <sup>18,21,25,26,30</sup>, the former three of which were also  
298 overrepresented in the SAT transcriptome of the GOTO study (Figure 2). Lastly, in overweight  
299 or obese participants of a weight-loss intervention study (6 months, diet, physical activity  
300 separate and combined), genes involved in signaling pathways, translation, cell life span and  
301 ATP binding were significantly overrepresented <sup>31</sup>, part of which we also identified in GOTO.

302 The effects of the muscle transcriptome to physical activity changes were reported in both  
303 anabolic and catabolic interventions, the latter being more similar to the regimen in GOTO. In  
304 line with the results found in GOTO, a systematic review investigating the effects of 21 activity  
305 interventions on the ECM in muscle, found that both types of activity interventions had a  
306 positive effect on collagen level and identified ECM adaptations related to muscle remodeling  
307 in both young and older participants <sup>27</sup>. Not all gene expression effects are common to all  
308 interventions. A 6-months aerobic, resistance, or aerobic + resistance training regimen in  
309 obese older adults changed expression of genes involved in myogenesis, autophagy,  
310 mitochondrial biogenesis and inflammation, in all three training regimens <sup>23</sup>, which was not  
311 observed for the muscle transcriptome in the GOTO study. This difference may be ascribed to  
312 the better health at baseline of GOTO individuals and/or the duration and intensity of this in  
313 essence anabolic intervention. Another anabolic 6-month resistance training intervention in  
314 frail and healthy older adults, showed effects similar to GOTO; an increase in expression levels  
315 of collagen and extracellular matrix related genes <sup>22</sup>. Finally, in mice a combined caloric  
316 restriction and physical activity intervention reported DEGs involved in MAPK signaling,  
317 metabolic processes, cholesterol metabolism, extracellular matrix organization <sup>36</sup>, which we  
318 also found in the GOTO study (Figure 2).

319 There is a number of other differences in study designs as compared to reported  
320 interventions. GOTO was a personalized intervention, to mimic a realistic situation when  
321 people change their lifestyle. Consequently, there was a considerable variation in the  
322 instructed lifestyle change between the participants; some changed their diet more, while  
323 other focused more in a change in physical activity. Furthermore the transcriptome in GOTO  
324 was measured in tissues taken after a standardized meal <sup>17</sup>, which is usually not done.

325 A direct association between the expression levels in adipose tissue and muscle, and  
326 classical metabolic health markers is generally not looked into, making it difficult to relate the  
327 effects identified in GOTO (Figure 4). However, one cohort study of BMI discordant  
328 monozygotic twins ( $\Delta\text{BMI} \geq 2.5 \text{ kg/m}^2$ ) reported on adipose tissue and skeletal muscle  
329 transcriptome differences <sup>41</sup>. This study identified DEGs involved in ECM remodeling,  
330 DNA/RNA metabolism, mitochondrial metabolism (both adipose tissue and skeletal muscle),  
331 fatty acid metabolism, MAPK and AMPK signaling (adipose tissue only), and amino acid  
332 metabolism (skeletal muscle only) <sup>41</sup>, which largely overlap with the overrepresented  
333 pathways in GOTO (Figure 2). Additionally, it was emphasized that combined differential gene  
334 expression scores of the adipose tissue transcriptome were stronger associated with classical  
335 metabolic health markers (including BMI, whole-body fat%, HDL cholesterol) than those of  
336 muscle transcriptome <sup>41</sup>, which we also observed in GOTO (Figure 4).

337 When investigating the effects of the DEGs of one tissue in the other two tissues, we  
338 identified that the intervention had an effect on the SAT DEGs in the muscle transcriptome,  
339 but not the other way around (Figure 3). This indicated that the muscle transcriptome  
340 captured some of the effects on the SAT transcriptome, possibly by a SAT component in the  
341 muscle tissue.

342 Using the JIVE data integration approach <sup>40</sup>, we have identified a shared variation between  
343 the three tissues in the male samples represented by two joint components (Supplementary  
344 Figures 1 & 2, Supplementary Table 8). The genes that drove these two joint components  
345 were involved in phospholipid metabolism and the immune system, respectively (Figure 5).  
346 Like the eigengene effects in the postprandial muscle transcriptome (Figure 3 and 4), the  
347 genes driving the first joint component (JC1) in blood showed a strong intervention effect but  
348 did not capture metabolic health effects (Figure 6). Moreover, these genes were also more

349 correlated to variances in the muscle transcriptome than the SAT transcriptome  
350 (Supplementary Figure 3). Conversely, similarly to the effects in postprandial SAT, the genes  
351 driving the second joint component (JC2) in blood strongly captured the metabolic health  
352 effects of the intervention but had a weaker association to the intervention itself. This was  
353 also confirmed by a higher correlation with variances in the SAT transcriptome than the  
354 muscle transcriptome of the genes belonging to this second joint blood component  
355 (Supplementary Figure 3). From these results, we postulated that JC1 in blood was largely  
356 driven by the muscle transcriptome, while JC2 in blood was primarily driven by the SAT  
357 transcriptome.

358 This study faced several limitations, which need to be considered when interpreting the  
359 results. Firstly the number of participants with transcriptomics measurements of postprandial  
360 blood (88; 45 males, 24 females), postprandial SAT (78; 38 males, 40 females) and  
361 postprandial muscle (82; 48 males, 34 females), is relatively low, compared to the complete  
362 number of participants of the GOTO study (153; 75 males, 78 females). The variation in the  
363 instructed lifestyle changes in combination with the low number of samples and slight  
364 differences at baseline (Supplementary Table 1), could also have led to a large variation in  
365 outcomes when comparing participants with postprandial blood, SAT and muscle  
366 transcriptome measurements (Table 1). To circumvent part of this variation, the effects  
367 between the transcriptome and metabolic health markers were only studied within the  
368 participants with transcriptomic measurements in postprandial blood, SAT and muscle (57;  
369 33 males, 24 females). Secondly, the group of participants with transcriptomic measurements  
370 of all three tissues was also used for the JIVE analysis. In females, the JIVE model did not  
371 identify a shared variation, this could be because of the shared effects between the tissues  
372 were too weak, which was likely attenuated by the low number of participants (24). In males,



373 the JIVE analysis did identify two joint components between the transcriptomes of the three  
374 tissues.

375 Overall, we were able to identify considerable effects of a 13-week moderate nutritional  
376 and physical activity intervention on the transcriptome of SAT and muscle of healthy older  
377 adults. We demonstrated that the changes in expression of genes in metabolism pathways in  
378 SAT, and collagen and muscle remodeling pathways in muscle associated with beneficial  
379 features of overall metabolic health. These health effects were best captured by the  
380 postprandial SAT transcriptome. We identified a joint space of three tissues in postprandial  
381 blood, which was able to capture some of the effects in the other two tissues, even though  
382 postprandial blood alone did not capture this. We propose that this method could be used to  
383 estimate part of the effect of an intervention on SAT and muscle transcriptomes, when only  
384 blood expression data is available.

## 385 **Materials and Methods**

### 386 *Study Design*

387 The Growing Old tOgether (GOTO) study was a 13-week lifestyle intervention study with 164  
388 healthy older adult participants (83 males, 81 females, mean age 62.9 +- 5.7, mean BMI 26.9  
389 +- 2.5). The participants underwent a 25% reduction in energy expenditure, equally divided  
390 over decreased nutrient intake and increased physical activity, as described in <sup>6</sup>. Both before  
391 and after the intervention, the participants were subjected to a nutrient challenge, consisting  
392 of an overnight fast and an intake of standardized nutrient shake, as described in <sup>17</sup>. Thirty  
393 minutes after the nutrient challenge, samples of postprandial whole blood, postprandial  
394 subcutaneous adipose tissue (SAT) (*subcutaneous abdominal fat pad*) and postprandial  
395 muscle (*vastus vascularis*) were taken. Out of 164 participants, 153 (75 men, 78 women) were

396 compliant to the intervention according to thresholds described in <sup>12</sup>. Out of 153 compliant  
397 participants, postprandial transcriptomics were measured in three tissues: 88 (45 males, 43  
398 females) in blood, 78 (38 males, 40 females) in SAT, 82 (48 males, 34 females) in muscle. Fifty-  
399 seven participants (33 males, 24 females) had postprandial transcriptomic measurements in  
400 all three tissues.

#### 401 *Diagnostic Measurements*

402 All measurements were performed in fasting serum collected through venipuncture. Insulin  
403 was measured using a Immulite 2000 xPi (Siemens, Eschborn, Germany). HOMA2-IR was  
404 calculated using the publicly available HOMA calculator  
405 (<https://www.dtu.ox.ac.uk/homacalculator/>) <sup>42</sup>. Fasting HDL cholesterol and HDL cholesterol  
406 size were measured using the previously described Nightingale platform <sup>43</sup>. Complete  
407 methods of diagnostic measurements are described in <sup>6</sup>.

#### 408 *DEXA measurements*

409 Method for the DEXA measurements is described in <sup>14</sup>. In short: whole-body DEXA  
410 (Discovery A, Hologic Inc., Bedford, MA, USA) was used to measure eleven body composition  
411 components, including whole-body fat mass and trunk fat mass. Whole-body fat% was  
412 calculated by dividing whole-body fat mass by whole-body mass. Trunk fat% was calculated  
413 by dividing the trunk fat mass by the total trunk weight.

#### 414 *Investigation of Health Marker Effects*

415 The intervention effect of each health marker was calculated using a linear mixed model,  
416 adjusted for age (fixed effects) and individual (random effects). The effect for males and  
417 females were calculated separately. The significance was adjusted for multiple testing using  
418 the Bonferroni correction method.

#### 419 *RNA isolation and Sequencing*

420 The method for RNA isolation and sequencing is described in <sup>17</sup>. In short: libraries were  
421 prepared using Illumina TruSeq version 2 library preparation kits. Data processing was  
422 performed the in-house BIOPET Gentrapp pipeline, described in <sup>44</sup>. The following steps were  
423 part of the data processing: low quality trimming using sickle version 12.00. Cutadapt  
424 version 1.1 was used to perform the adapter clipping. The reads were aligned to GRCh37,  
425 while masking for SNPs common in the Dutch population (GoNL <sup>45</sup> MAF > 0.01), using STAR  
426 version 2.3.0e. Picard version 2.4.1. was used to perform sam to bam conversion and  
427 sorting. Read quantification was performed using htseq-count version 0.6.1.p1 using  
428 Ensemble gene annotations version 86 for gene definitions. In postprandial blood, the  
429 sequencing resulted in an average of 37.2 million reads per sample, 97% (+- 0.4%) of which  
430 were mapped. In postprandial SAT, samples had an average of 11.4 million sequenced  
431 reads, 95% (+- 1.6%) of which were mapped. In postprandial muscle, an average of 36.9  
432 million sequence reads per sample, 98% (+- 0.4%) of which were mapped.

#### 433 *Differential Gene Expression*

434 In all tissues, the normalizations and differential gene expression analysis were performed in  
435 a sex stratified manner. Genes that had less than 2 counts on average, were removed from  
436 the dataset. Tissue specific confounders were identified by associating them with the  
437 principal components that represent 90% of variation of TMM-CPM normalized gene  
438 expression.

439 *Postprandial Blood.* There were 88 participants (45 male, 43 females) with RNA-seq  
440 measurements pre -and post intervention. We adjusted for the following confounders: 1)  
441 technical effects: median 5' bias, median 3' bias, and flowcell, mean insert size in female

442 samples only, 2) cell type percentages: eosinophiles, monocytes, lymphocytes, basophiles),  
443 and 3) personal details (age at baseline, and person ID as a random effect).

444 *Postprandial SAT*. 78 participants (38 male, 40 female) had RNA-seq measurements pre-and  
445 post-intervention. We adjusted for the following confounders: 1) technical effects: molarity  
446 of sample, isolation date, and plate number in female samples only; and 2) personal  
447 measures: age at baseline, and person ID as a random effect.

448 *Postprandial Muscle*. There were 82 participants (48 male, 34 female) with RNA-seq  
449 measurements pre- and post-intervention. In male samples we adjusted for the following  
450 confounders: 1) technical effects: total yield, flow cell, isolations series, 28S/18S ratio, plate  
451 number, mean insert size, total number of aligned bases, RNA integrity number, median 5'  
452 bias, median 3' bias; and 2) personal details: age at baseline, and person ID as a random effect.

453 In female samples, we adjusted for the following confounders: 1) technical effects: RNA  
454 260/280 ratio, 28S/18S ratio, biopsy number, hand grip strength, RNA integrity number, mean  
455 insert size, isolation series, sequence % that passed quality control, total yield, total number  
456 of aligned bases, median 3' bias; and 2) personal details: age at baseline, and person ID as a  
457 random effect.

458 The differential gene expression analysis was performed using linear mixed models analysis  
459 (limma version 3.52.2) in combination with VOOM normalization<sup>46</sup>. We adjusted for multiple  
460 testing using the false discovery rate. An fdr-adjusted p-value < 0.01 was considered  
461 significant. Genes with an absolute log<sub>2</sub> fold change ≥ 0.25 were considered differentially  
462 expressed.

#### 463 *Functional Enrichment*

464 The pathway overrepresentation analysis was performed using the enricher function of  
465 clusterProfiler (version 4.4.4)<sup>47</sup>. Up-and downregulated significant DEGs were used as an

466 input, all expressed genes that passed the quality control were used as a background. The  
467 Reactome database (version 81) <sup>48</sup> was used for the functional enrichment. The tests were  
468 adjusted for multiple testing using the Bonferroni correction method. An adjusted p-value  
469 below 0.05 was considered significant.

#### 470 *Eigengene Analysis*

471 The input for the eigengene calculation were the up- or downregulated significant DEGs. The  
472 eigengenes were calculated using the *prcomp* function of R package *stats* (version 4.2.1) <sup>49</sup>,  
473 the first principal component was considered the eigengene. Eigengene values were scaled  
474 to mean 0 and standard deviation (sd) 1. The associations between the intervention (0 for  
475 baseline, 1 for post intervention) and the eigengenes was calculated with logistic regression  
476 using the function *glmer* of package *glmnet* (version 4.1-6) <sup>50</sup>, adjusting for the same  
477 covariates as in the differential gene expression analysis. The significance level of the  
478 association was adjusted for multiple testing, using the false discovery rate. Similarly, the  
479 association between eigengenes and metabolic health markers are calculated. Metabolic  
480 health marker measurements were scaled to mean 0 and sd 1. Outliers more than 3 sd values  
481 from the mean were removed. Only participants with transcriptome measurements of all  
482 three tissues were used in the health marker association analysis.

#### 483 *Joint and Individual Variation Explained (JIVE) Analysis*

484 The Joint and Individual Variation Explained (JIVE) was calculated using the R package *r.jive*  
485 (version 2.4) <sup>40,51</sup>. Analysis was performed on all genes that passed the quality control across  
486 57 participants (33 Male, 24 Female). Prior to JIVE, the gene expression levels were scaled to  
487 a mean of 0 and a sd of 1. For each tissue matrix  $X^t \in \mathbb{R}^{p_t \times n}$  (where  $t$  represents the tissue,  
488  $p_t$  represents the number of genes measured for tissue  $t$ , and  $n$  represents the number of

489 samples), the JIVE analysis linearly decomposes the input matrix ( $X^t$ ) into three matrices  
490 representing: 1) the shared data across the tissue:  $J^t \in \mathbb{R}^{p_t \times n}$  explaining the joint variation  
491 across the three tissue types, 2) a data matrix representing the variation unique to a tissue:  
492  $A^t \in \mathbb{R}^{p_t \times n}$ , and 3) a data matrix representing the residual noise, i.e the remaining  
493 unexplained variation in a tissue:  $R^t \in \mathbb{R}^{p_t \times n}$ , with:  $X^t = J^t + A^t +$   
494  $R^t$  (Supplementary Figure 1).  $J^t$  is further decomposed into sub-matrices  $J^t = U^t S$ ,  
495 where  $U^t \in \mathbb{R}^{p_t \times r}$  represents a matrix containing the  $p_t$  gene loading vectors for the  $r$  joint  
496 components, and  $S$  is a sample scoring matrix of joint effects across all tissues ( $S$  is the same  
497 for all tissues). The number of joint components,  $r$ , is selected using permutation testing as  
498 described in <sup>40</sup>. Likewise,  $A^t$  is decomposed, and for each tissue,  $A^t = W^t S^t$ , where  $W^t \in$   
499  $\mathbb{R}^{p_t \times r_t}$  represents a matrix containing the  $p_t$  gene loading vectors for the  $r_t$  individual tissue  
500 components (selected by permutation testing), and  $S^t \in \mathbb{R}^{r_t \times n}$  is a sample scoring matrix of  
501 individual components. For each tissue, we can identify the genes that contribute most to the  
502 joint and individual effects based on the ranking of genes by each column of  $U^t$  and  $W^t$ ,  
503 respectively.

## 504 Data Availability Statement

505 The data that support the findings of this study are accessible upon request to the  
506 corresponding author. The data are not publicly available due to privacy or ethical  
507 restrictions.

## 508 Conflict of Interest Statement

509 The authors have stated explicitly that there are no conflicts of interest in connection with  
510 this article.

## 511 Author Contributions

512 P.E. Slagboom and C.P.G.M. de Groot designed the study. M. Beekman collected and  
513 curated the health data. N. Lakenberg and E. Suchiman generated the transcriptome data.  
514 F.A. Bogaards T. Gehrman, M.J.T. Reinders and P.E. Slagboom designed the data analysis  
515 approach, F.A. Bogaards, performed data analysis and F.A. Bogaards, T. Gehrman, M.J.T.  
516 Reinders, C.P.G.M. de Groot and P.E. Slagboom performed the research and interpreted the  
517 data. All authors were involved in drafting and revising the manuscript.

## 518 Ethics Statement

519 The Medical Ethical Committee of the Leiden University Medical Center approved the study  
520 (P11.187) and all participants signed a written informed consent. All experiments were  
521 performed in accordance with relevant and approved guidelines and regulations. This trial  
522 was registered at the Dutch Trial Register (<http://www.trialregister.nl>) as NTR3499.

## 523 Funding and Acknowledgements

524 This work was funded by the Horizon 2020 ERC Advanced grant: GEROPROTECT, the  
525 Netherlands Consortium for Healthy Ageing (NWO grant 050-060-810), the framework of  
526 the BBMRI Metabolomics Consortium funded by BBMRI-NL (NWO 184.021.007 and  
527 184.033.111), ZonMw Project VOILA (ZonMW 457001001) and X-omics (NWO 184.034.019).  
528 The funding agencies had no role in the design and conduct of the study; collection,  
529 management, analysis, and interpretation of the data; and preparation, review, or approval  
530 of the manuscript. The authors would like to express their gratitude to all participants of the  
531 GOTO study who did their very best to adhere to the intervention guidelines and underwent  
532 all measurements.

## 533 References

- 534 1. Partridge, L., Deelen, J. & Slagboom, P. E. Facing up to the global challenges of ageing.  
535 *Nature* **561**, 45–56 (2018).
- 536 2. Sander, M. *et al.* The challenges of human population ageing. *Age Ageing* **44**, 185–  
537 187 (2015).
- 538 3. Finkel, T. The metabolic regulation of aging. *Nat. Med.* *2015* **21**, 1416–1423  
539 (2015).
- 540 4. Salvioli, S. *et al.* Immune System, Cell Senescence, Aging and Longevity - Inflamm-  
541 Aging Reappraised. *Curr. Pharm. Des.* **19**, 1675–1679 (2013).
- 542 5. Ravussin, E. *et al.* A 2-year randomized controlled trial of human caloric restriction:  
543 Feasibility and effects on predictors of health span and longevity. *Journals Gerontol. -*  
544 *Ser. A Biol. Sci. Med. Sci.* **70**, 1097–1104 (2015).
- 545 6. van de Rest, O. *et al.* Metabolic effects of a 13-weeks lifestyle intervention in older  
546 adults: The Growing Old Together Study. *Aging (Albany. NY)*. **8**, 111–126 (2016).
- 547 7. Marseglia, A. *et al.* Effect of the NU-AGE diet on cognitive functioning in older adults:  
548 A randomized controlled trial. *Front. Physiol.* **9**, (2018).
- 549 8. Fitzgerald, K. N. *et al.* Potential reversal of epigenetic age using a diet and lifestyle  
550 intervention: a pilot randomized clinical trial. *Aging (Albany NY)* **13**, 9419 (2021).
- 551 9. Villareal, D. T. *et al.* Effect of lifestyle intervention on metabolic coronary heart  
552 disease risk factors in obese older adults. *Am. J. Clin. Nutr.* **84**, 1317–1323 (2006).
- 553 10. Campbell, K. L., Landells, C. E., Fan, J. & Brenner, D. R. A Systematic Review of the  
554 Effect of Lifestyle Interventions on Adipose Tissue Gene Expression: Implications for  
555 Carcinogenesis. *Obesity* **25**, S40–S51 (2017).



- 556 11. Das, S. K. *et al.* Body-composition changes in the Comprehensive Assessment of Long-  
557 term Effects of Reducing Intake of Energy (CALERIE)-2 study: A 2-y randomized  
558 controlled trial of calorie restriction in nonobese humans. *Am. J. Clin. Nutr.* **105**, 913–  
559 927 (2017).
- 560 12. Bogaards, F. A. *et al.* PLIS: A metabolomic response monitor to a lifestyle intervention  
561 study in older adults. *FASEB J.* **36**, e22578 (2022).
- 562 13. Almanza-Aguilera, E. *et al.* Impact in Plasma Metabolome as Effect of Lifestyle  
563 Intervention for Weight-Loss Reveals Metabolic Benefits in Metabolically Healthy  
564 Obese Women. *J. Proteome Res.* **17**, 2600–2610 (2018).
- 565 14. Beekman, M. *et al.* Lifestyle-Intervention-Induced Reduction of Abdominal Fat Is  
566 Reflected by a Decreased Circulating Glycerol Level and an Increased HDL Diameter.  
567 *Mol. Nutr. Food Res.* **64**, (2020).
- 568 15. Diener, C. *et al.* Baseline Gut Metagenomic Functional Gene Signature Associated  
569 with Variable Weight Loss Responses following a Healthy Lifestyle Intervention in  
570 Humans. *mSystems* **6**, (2021).
- 571 16. Franzke, B. *et al.* The plasma proteome is favorably modified by a high protein diet  
572 but not by additional resistance training in older adults: A 17-week randomized  
573 controlled trial. *Front. Nutr.* **9**, (2022).
- 574 17. Gehrmann, T. *et al.* A combined lifestyle intervention induces a sensitization of the  
575 blood transcriptomic response to a nutrient challenge. *bioRxiv* 2021.05.18.444591  
576 (2021) doi:10.1101/2021.05.18.444591.
- 577 18. Swindell, W. R., List, E. O., Berryman, D. E. & Kopchick, J. J. Transcriptional profiling  
578 identifies strain-specific effects of caloric restriction and opposite responses in human  
579 and mouse white adipose tissue. *Aging (Albany, NY)*. **10**, 701–746 (2018).

- 580 19. Rubenstein, A. B. *et al.* Skeletal muscle transcriptome response to a bout of  
581 endurance exercise in physically active and sedentary older adults. *Am. J. Physiol. -*  
582 *Endocrinol. Metab.* **322**, E260–E277 (2022).
- 583 20. van Bussel, I. P. G., Fazelizadeh, P., Frost, G. S., Rundle, M. & Afman, L. A. Measuring  
584 phenotypic flexibility by transcriptome time-course analyses during challenge tests  
585 before and after energy restriction. *FASEB J.* **33**, 10280–10290 (2019).
- 586 21. Capel, F. *et al.* Macrophages and adipocytes in human obesity: adipose tissue gene  
587 expression and insulin sensitivity during calorie restriction and weight stabilization.  
588 *Diabetes* **58**, 1558–1567 (2009).
- 589 22. Hangelbroek, R. W. J. *et al.* Expression of protocadherin gamma in skeletal muscle  
590 tissue is associated with age and muscle weakness. *J. Cachexia. Sarcopenia Muscle* **7**,  
591 604–614 (2016).
- 592 23. Colleluori, G. *et al.* Aerobic Plus Resistance Exercise in Obese Older Adults Improves  
593 Muscle Protein Synthesis and Preserves Myocellular Quality Despite Weight Loss. *Cell*  
594 *Metab.* **30**, 261-273.e6 (2019).
- 595 24. Day, K. *et al.* Transcriptomic changes in peripheral blood mononuclear cells with  
596 weight loss: systematic literature review and primary data synthesis. (2021)  
597 doi:10.1186/s12263-021-00692-6.
- 598 25. Wahl, D. & LaRocca, T. J. Transcriptomic Effects of Healthspan-Promoting Dietary  
599 Interventions: Current Evidence and Future Directions. *Front. Nutr.* **8**, 515 (2021).
- 600 26. Fachim, H. A. *et al.* Lifestyle intervention in individuals with impaired glucose  
601 regulation affects Caveolin-1 expression and DNA methylation. *Adipocyte* **9**, 96–107  
602 (2020).
- 603 27. Kritikaki, E. *et al.* Exercise training-induced extracellular matrix protein adaptation in

- 604 locomotor muscles: A systematic review. *Cells* **10**, (2021).
- 605 28. Matsuo, Y. *et al.* Impaired HDL function in obese adolescents: Impact of lifestyle  
606 intervention and bariatric surgery. *Obesity* **21**, E687–E695 (2013).
- 607 29. Ellsworth, D. L. *et al.* Intensive cardiovascular risk reduction induces sustainable  
608 changes in expression of genes and pathways important to vascular function. *Circ.*  
609 *Cardiovasc. Genet.* **7**, 151–160 (2014).
- 610 30. Armenise, C. *et al.* Transcriptome profiling from adipose tissue during a low-calorie  
611 diet reveals predictors of weight and glycemic outcomes in obese, nondiabetic  
612 subjects. *Am. J. Clin. Nutr.* **106**, 736–746 (2017).
- 613 31. Campbell, K. L. *et al.* Gene expression changes in adipose tissue with diet-and/or  
614 exercise-induced weight loss. *Cancer Prev. Res.* **6**, 217–231 (2013).
- 615 32. Vroege, D. P. *et al.* Dose-response effects of a Web-based physical activity program  
616 on body composition and metabolic health in inactive older adults: Additional  
617 analyses of a randomized controlled trial. *J. Med. Internet Res.* **16**, (2014).
- 618 33. Rickman, A. D. *et al.* The CALERIE Study: Design and methods of an innovative 25%  
619 caloric restriction intervention. *Contemp. Clin. Trials* **32**, 874–881 (2011).
- 620 34. Verberne, L. D. M. *et al.* Evaluation of a combined lifestyle intervention for  
621 overweight and obese patients in primary health care: a quasi-experimental design.  
622 *Fam. Pract.* **33**, 671–677 (2016).
- 623 35. Fazelzadeh, P. *et al.* Weight loss moderately affects the mixed meal challenge  
624 response of the plasma metabolome and transcriptome of peripheral blood  
625 mononuclear cells in abdominally obese subjects. *Metabolomics* **14**, (2018).
- 626 36. Feng, Y. *et al.* Transcriptomics Dissection of Calorie Restriction and Exercise Training  
627 in Brown Adipose Tissue and Skeletal Muscle. *Nutrients* **15**, 1047 (2023).

- 628 37. Rowland, B. *et al.* Transcriptome-wide association study in UK Biobank Europeans  
629 identifies associations with blood cell traits. *Hum. Mol. Genet.* **31**, 2333–2347 (2022).
- 630 38. Harris, S. E. *et al.* Age-related gene expression changes, and transcriptome wide  
631 association study of physical and cognitive aging traits, in the Lothian Birth Cohort  
632 1936. *Aging (Albany NY)* **9**, 2489 (2017).
- 633 39. Reel, P. S., Reel, S., Pearson, E., Trucco, E. & Jefferson, E. Using machine learning  
634 approaches for multi-omics data analysis: A review. *Biotechnol. Adv.* **49**, 107739  
635 (2021).
- 636 40. Lock, E. F., Hoadley, K. A., Marron, J. S. & Nobel, A. B. Joint and individual variation  
637 explained (JIVE) for integrated analysis of multiple data types. *Ann. Appl. Stat.* **7**, 523–  
638 542 (2013).
- 639 41. van der Kolk, B. W. *et al.* Molecular pathways behind acquired obesity: Adipose tissue  
640 and skeletal muscle multiomics in monozygotic twin pairs discordant for BMI. (2021)  
641 doi:10.1016/j.xcrm.2021.100226.
- 642 42. Wallace, T. M., Levy, J. C. & Matthews, D. R. Use and abuse of HOMA modeling.  
643 *Diabetes Care* **27**, 1487–1495 (2004).
- 644 43. P, S. *et al.* High-throughput serum NMR metabonomics for cost-effective holistic  
645 studies on systemic metabolism. *Analyst* **134**, 1781–1785 (2009).
- 646 44. Zhernakova, D. V *et al.* Identification of context-dependent expression quantitative  
647 trait loci in whole blood. *Nat. Genet.* **2016 491 49**, 139–145 (2016).
- 648 45. Francioli, L. C. *et al.* Whole-genome sequence variation, population structure and  
649 demographic history of the Dutch population. *Nat. Genet.* **2014 468 46**, 818–825  
650 (2014).
- 651 46. Law, C. W., Chen, Y., Shi, W. & Smyth, G. K. Voom: Precision weights unlock linear

- 652 model analysis tools for RNA-seq read counts. *Genome Biol.* **15**, 29 (2014).
- 653 47. Yu, G., Wang, L. G., Han, Y. & He, Q. Y. clusterProfiler: an R package for comparing  
654 biological themes among gene clusters. *OMICS* **16**, 284–287 (2012).
- 655 48. Gillespie, M. *et al.* The reactome pathway knowledgebase 2022. *Nucleic Acids Res.* **50**,  
656 D687–D692 (2022).
- 657 49. R Core Team. R Core Team 2021 R: A language and environment for statistical  
658 computing. R foundation for statistical computing. <https://www.R-project.org/>. *R*  
659 *Found. Stat. Comput.* **2**, 2019 (2022).
- 660 50. Friedman, J., Hastie, T. & Tibshirani, R. Regularization Paths for Generalized Linear  
661 Models via Coordinate Descent. (2009).
- 662 51. O’Connell, M. J. & Lock, E. F. R.JIVE for exploration of multi-source molecular data.  
663 *Bioinformatics* **32**, 2877–2879 (2016).
- 664

**Table 1: Effect of the 13-weeks lifestyle intervention on metabolic health marker measurements differs per subset selection.**

| Health Marker, mean (SD)         | Sex    | Complete GOTO dataset<br>153<br>(75 Male, 78 Female) |          | Overlapping Blood, SAT and<br>Muscle<br>Samples 57<br>(33 Male, 24 Female) |          | Blood Postprandial Samples<br>88 (45 Male, 43 Female) |          | SAT Postprandial Samples<br>78 (38 Male, 40 Female) |          | Muscle Postprandial<br>Samples<br>82 (48 Male, 34 Female) |          |
|----------------------------------|--------|------------------------------------------------------|----------|----------------------------------------------------------------------------|----------|-------------------------------------------------------|----------|-----------------------------------------------------|----------|-----------------------------------------------------------|----------|
|                                  |        | Delta (sd)                                           | P-adjust | Delta (sd)                                                                 | P-adjust | Delta (sd)                                            | P-adjust | Delta (sd)                                          | P-adjust | Delta (sd)                                                | P-adjust |
| BMI, kg/m <sup>2</sup>           | Male   | -1.09 (0.78)                                         | 2.4e-18* | -1.02 (0.78)                                                               | 1.8e-07* | -1.15 (0.79)                                          | 1.4e-11* | -1.10 (0.77)                                        | 1.3e-09* | -1.18 (0.78)                                              | 6.9e-13* |
| Waist Circumference              | Male   | -4.49 (5.26)                                         | 1.8e-09* | -3.82 (4.97)                                                               | 1.1e-03* | -4.47 (5.29)                                          | 1.1e-05* | -4.42 (5.10)                                        | 4.8e-05* | -4.94 (5.41)                                              | 8.7e-07* |
| Systolic Blood Pressure, mm Hg   | Male   | -3.25 (12.54)                                        | 2.8e-01  | -3.80 (14.36)                                                              | 1.0e+00  | -2.52 (13.42)                                         | 1.0e+00  | -3.91 (14.14)                                       | 9.7e-01  | -3.05 (13.53)                                             | 1.0e+00  |
| Diastolic Blood Pressure, mm Hg  | Male   | -0.75 (6.98)                                         | 1.0e+00  | -3.04 (7.09)                                                               | 1.9e-01  | -2.27 (6.67)                                          | 2.7e-01  | -3.09 (7.10)                                        | 1.1e-01  | -2.32 (6.86)                                              | 2.3e-01  |
| Fasting Insulin, mU/L            | Male   | -0.31 (3.30)                                         | 1.0e+00  | 0.14 (3.63)                                                                | 1.0e+00  | 0.04 (3.62)                                           | 1.0e+00  | -0.11 (3.71)                                        | 1.0e+00  | -0.23 (3.72)                                              | 1.0e+00  |
| Whole-Body Fat, %                | Male   | -1.60 (1.65)                                         | 1.2e-09* | -1.17 (1.55)                                                               | 1.5e-03* | -1.43 (1.71)                                          | 8.2e-06* | -0.92 (1.52)                                        | 9.3e-05* | -1.77 (1.66)                                              | 4.8e-07* |
| Trunk Fat, %                     | Male   | -2.47 (2.13)                                         | 3.2e-12* | -1.96 (1.81)                                                               | 3.3e-05* | -2.26 (2.13)                                          | 2.3e-07* | -1.48 (1.74)                                        | 1.1e-06* | -2.59 (2.04)                                              | 8.7e-09* |
| Fasting HDL Cholesterol, mmol/L  | Male   | 0.04 (0.14)                                          | 8.2e-02  | 0.04 (0.13)                                                                | 1.0e+00  | 0.06 (0.14)                                           | 7.7e-02  | 0.05 (0.13)                                         | 3.4e-01  | 0.07 (0.14)                                               | 1.7e-02* |
| Fasting HDL Cholesterol size, nm | Male   | 0.06 (0.09)                                          | 2.0e-06* | 0.06 (0.08)                                                                | 9.9e-04* | 0.08 (0.08)                                           | 2.0e-06* | 0.06 (0.09)                                         | 4.6e-04* | 0.08 (0.09)                                               | 1.3e-06* |
| FRS                              | Male   | -0.40 (1.22)                                         | 5.8e-02  | -0.61 (1.37)                                                               | 1.6e-01  | -0.53 (1.25)                                          | 6.6e-02  | -0.58 (1.31)                                        | 9.7e-02  | -0.54 (1.24)                                              | 3.9e-02* |
| BMI, kg/m <sup>2</sup>           | Female | -1.23 (0.82)                                         | 1.4e-20* | -1.26 (0.72)                                                               | 1.4e-07* | -1.27 (0.64)                                          | 2.7e-15* | -1.35 (0.73)                                        | 3.0e-13* | -1.36 (0.74)                                              | 2.5e-11* |
| Waist Circumference              | Female | -4.33 (5.57)                                         | 1.4e-08* | -4.71 (5.74)                                                               | 5.4e-03* | -4.70 (5.30)                                          | 7.5e-06* | -4.58 (5.31)                                        | 3.0e-05* | -5.21 (5.32)                                              | 2.3e-05* |
| Systolic Blood Pressure, mm Hg   | Female | -3.01 (11.69)                                        | 2.6e-01  | -1.67 (11.69)                                                              | 1.0e+00  | -2.85 (11.30)                                         | 1.0e+00  | -2.46 (11.73)                                       | 1.0e+00  | -1.35 (12.07)                                             | 1.0e+00  |
| Diastolic Blood Pressure, mm Hg  | Female | -1.25 (6.52)                                         | 9.5e-01  | -1.19 (5.75)                                                               | 1.0e+00  | -1.66 (5.64)                                          | 6.1e-01  | -2.29 (6.27)                                        | 2.6e-01  | -1.43 (6.54)                                              | 1.0e+00  |
| Fasting Insulin, mU/L            | Female | -0.36 (3.25)                                         | 1.0e+00  | -0.30 (2.35)                                                               | 1.0e+00  | -0.02 (3.01)                                          | 1.0e+00  | -0.33 (3.63)                                        | 1.0e+00  | -0.90 (2.84)                                              | 7.3e-01  |
| Whole-Body Fat, %                | Female | -1.57 (1.70)                                         | 9.8e-09* | -1.33 (2.22)                                                               | 1.1e-02* | -1.64 (1.85)                                          | 5.2e-05* | -1.58 (1.98)                                        | 7.2e-05* | -1.98 (2.07)                                              | 2.5e-04* |
| Trunk Fat, %                     | Female | -2.22 (2.15)                                         | 3.1e-10* | -1.76 (2.78)                                                               | 7.1e-03* | -2.32 (2.36)                                          | 1.2e-05* | -2.31 (2.48)                                        | 2.6e-05* | -2.60 (2.57)                                              | 1.1e-04* |
| Fasting HDL Cholesterol, mmol/L  | Female | -0.04 (0.15)                                         | 2.7e-01  | -0.03 (0.14)                                                               | 1.0e+00  | -0.05 (0.16)                                          | 4.7e-01  | -0.05 (0.15)                                        | 5.9e-01  | 0.00 (0.14)                                               | 1.0e+00  |
| Fasting HDL Cholesterol size, nm | Female | 0.03 (0.08)                                          | 1.7e-02* | 0.05 (0.09)                                                                | 1.7e-01  | 0.02 (0.08)                                           | 6.0e-01  | 0.04 (0.08)                                         | 2.6e-02* | 0.04 (0.09)                                               | 9.1e-02  |
| FRS                              | Female | -0.65 (1.60)                                         | 5.5e-03* | -0.46 (1.59)                                                               | 1.0e+00  | -0.42 (1.47)                                          | 6.8e-01  | -0.62 (1.76)                                        | 3.1e-01  | -0.68 (1.79)                                              | 3.4e-01  |

Abbreviations: SD; standard deviation, SAT; subcutaneous adipose tissue, BMI; body mass index, FRS; Framingham Risk Score. Associations were calculated using a liner mixed model, adjusting for age at baseline and person ID (as a random effect). P-values were adjusted using the Bonferroni correction method, an adjusted p-value < 0.05 was indicated with an \*.

665

666  
667  
668

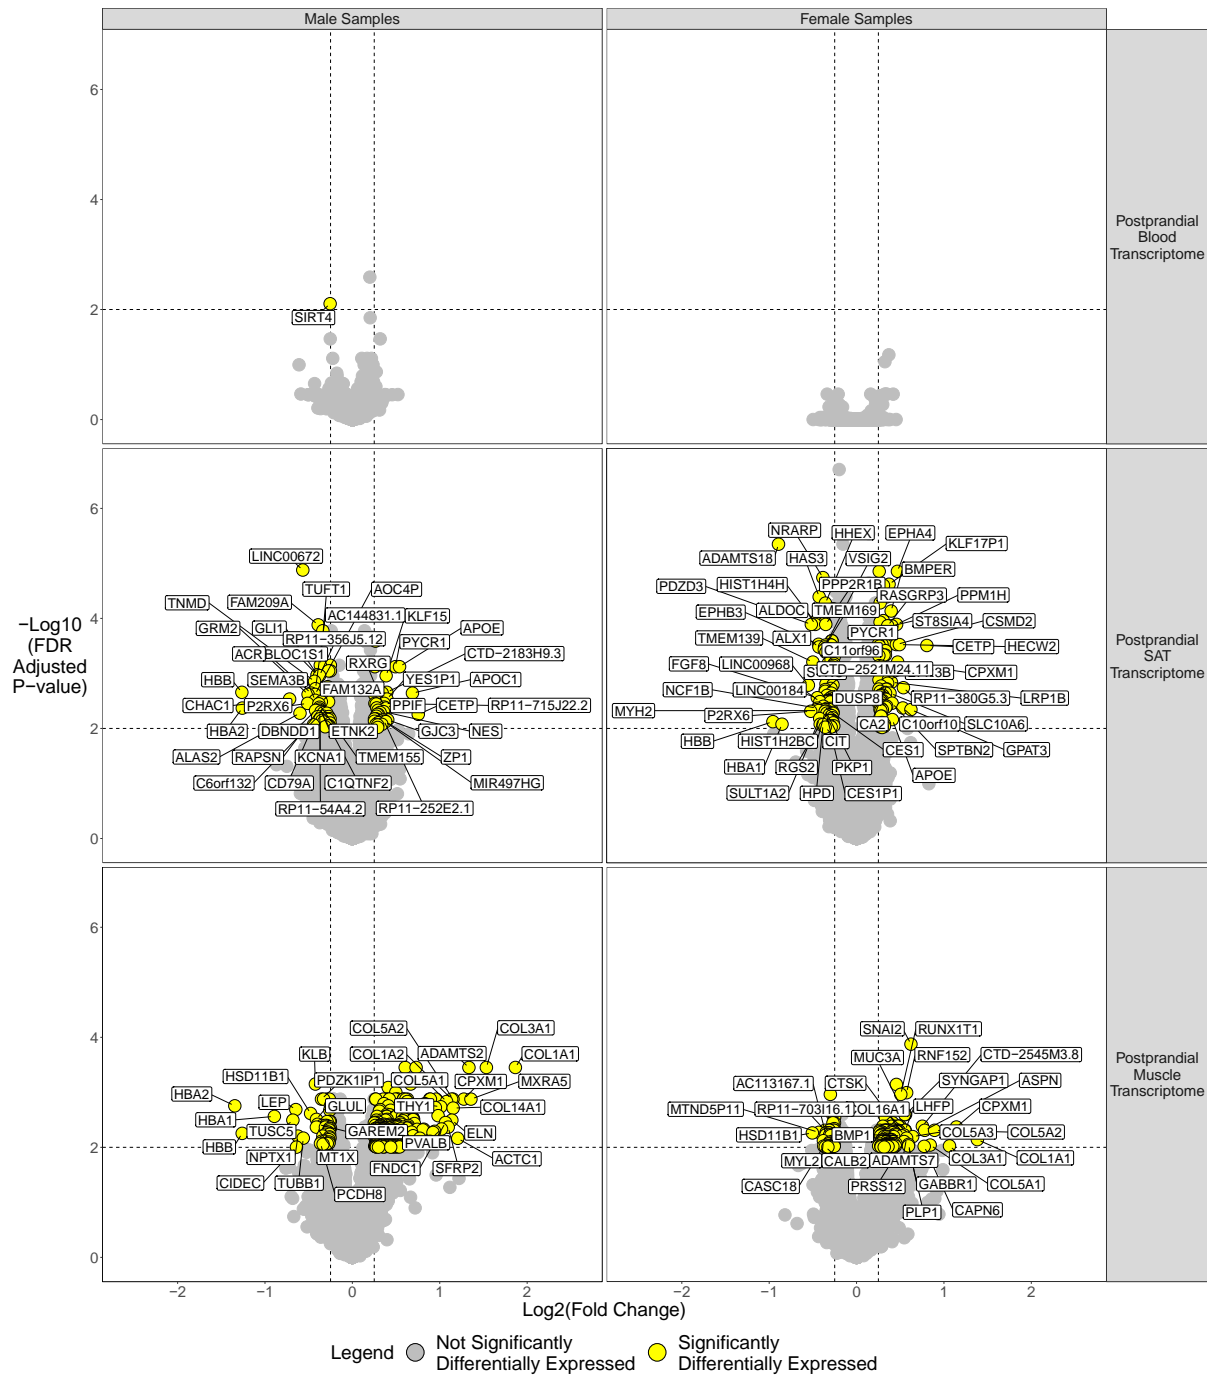

**Figure 1: Intervention effect on postprandial blood, SAT and muscle gene expression levels in men and women.** The  $\log_2$  fold change is plotted on the x-axis, the  $-\log_{10}$  FDR adjusted p-value is plotted on the y-axis. The dashed horizontal line represents the significance threshold of FDR 0.01, the two vertical lines represent the  $\log_2$  fold change thresholds of -0.25 and 0.25. Genes with an absolute  $\log_2$  fold change  $\geq 0.25$  and an FDR adjusted p-value  $< 0.01$  were considered significantly differentially expressed. Each dot represents a gene. Yellow dots represent the significantly differentially expressed genes (DEGs). Grey dots represent genes with an absolute  $\log_2$  fold change  $< 0.25$  and/or FDR  $\geq 0.01$ . Significantly differentially expressed genes with the strongest  $\log_2$  fold changes were labeled with their gene symbol. Abbreviations: SAT; subcutaneous adipose tissue.

669

670

**Table 2: The 13-weeks lifestyle intervention had the strongest effect on postprandial SAT and Muscle**

671

| Sex    | Tissue | State        | Direction of Effect | Expressed Genes | Genes with Log <sub>2</sub> FC ≥ 0.25 | Genes with FDR < 0.01 | Genes with Log <sub>2</sub> FC ≥ 0.25 & FDR < 0.01 |
|--------|--------|--------------|---------------------|-----------------|---------------------------------------|-----------------------|----------------------------------------------------|
| Male   | Blood  | Postprandial | Downregulated       | 8602            | 52                                    | 1                     | 1                                                  |
| Male   | Blood  | Postprandial | Upregulated         | 10093           | 45                                    | 1                     | 0                                                  |
| Male   | SAT    | Postprandial | Downregulated       | 10099           | 402                                   | 123                   | 48                                                 |
| Male   | SAT    | Postprandial | Upregulated         | 9614            | 173                                   | 180                   | 41                                                 |
| Male   | Muscle | Postprandial | Downregulated       | 9413            | 228                                   | 139                   | 46                                                 |
| Male   | Muscle | Postprandial | Upregulated         | 7166            | 674                                   | 239                   | 205                                                |
| Female | Blood  | Postprandial | Downregulated       | 9619            | 63                                    | 0                     | 0                                                  |
| Female | Blood  | Postprandial | Upregulated         | 9143            | 32                                    | 0                     | 0                                                  |
| Female | SAT    | Postprandial | Downregulated       | 9860            | 254                                   | 331                   | 92                                                 |
| Female | SAT    | Postprandial | Upregulated         | 9599            | 143                                   | 267                   | 76                                                 |
| Female | Muscle | Postprandial | Downregulated       | 9464            | 292                                   | 127                   | 46                                                 |
| Female | Muscle | Postprandial | Upregulated         | 7570            | 827                                   | 132                   | 122                                                |

672 *Abbreviations: SAT; subcutaneous adipose tissue*

673



674

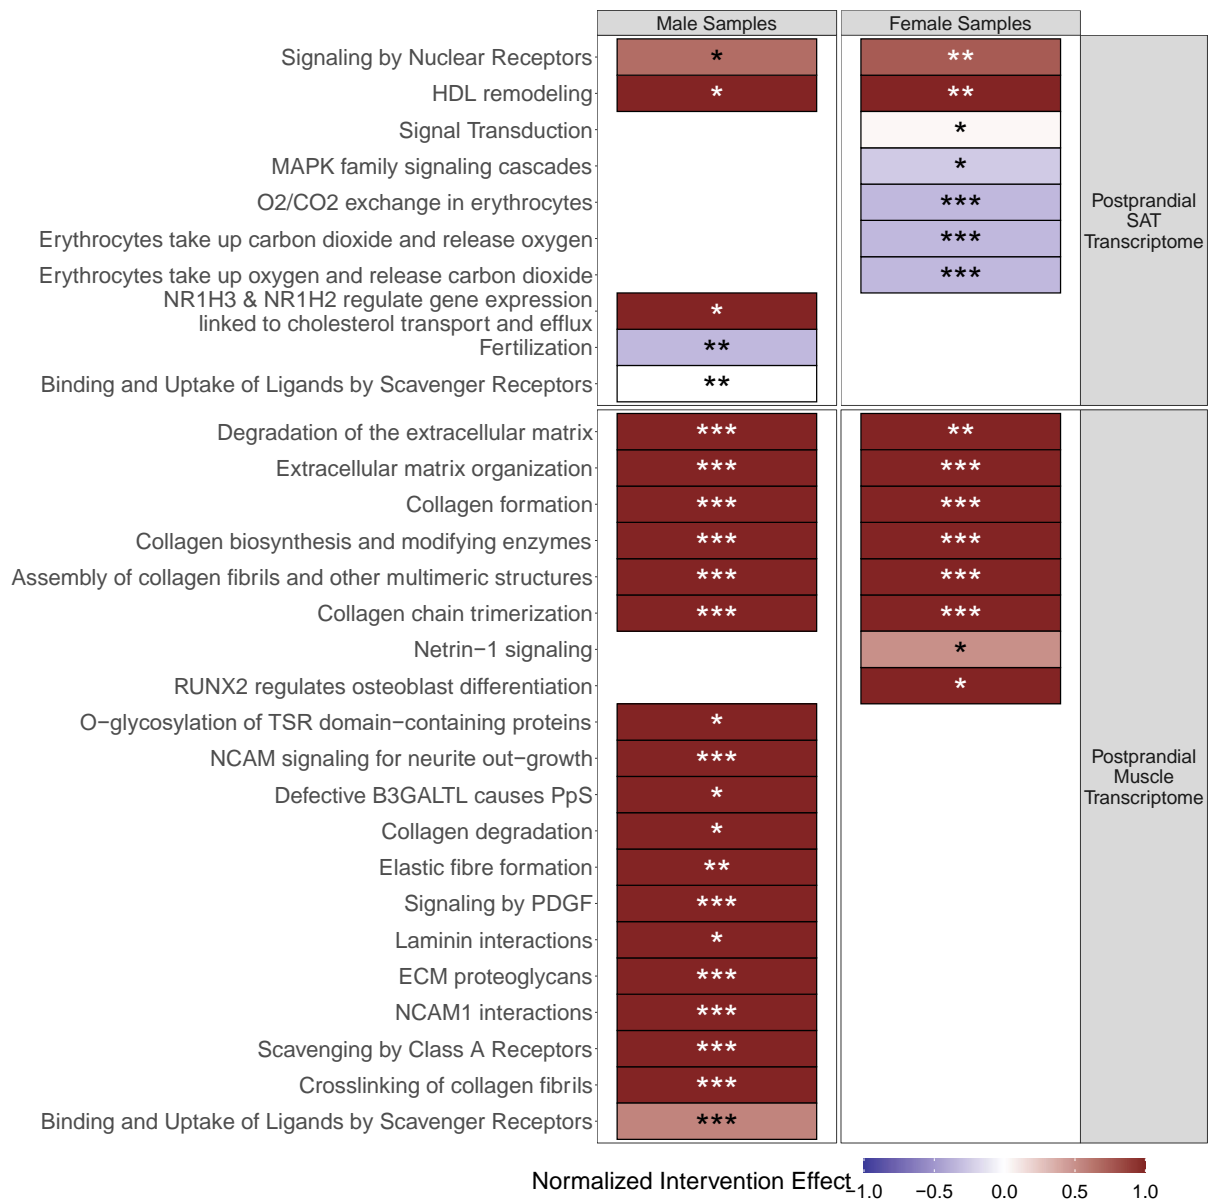

**Figure 2: Significantly Overrepresented pathways in Postprandial SAT and Muscle Transcriptome.** The overrepresented pathways are plotted on the y-axis. Overrepresented pathways in the male samples are plotted on the left, overrepresented samples in female samples, on the right. The fill color represents the normalized direction of effect: dark blue (-1) all significantly differentially expressed genes in the pathway were underexpressed, dark red (1) all significantly differentially expressed genes in the pathway were overexpressed. P-values were adjusted for multiple testing using the Bonferroni correction method. Significance is indicated by the asterisks (\* = p-adjust < 0.05, \*\* = p-adjust < 0.01, \*\*\* = p-adjust < 0.001). Abbreviations: SAT; subcutaneous adipose tissue.

675

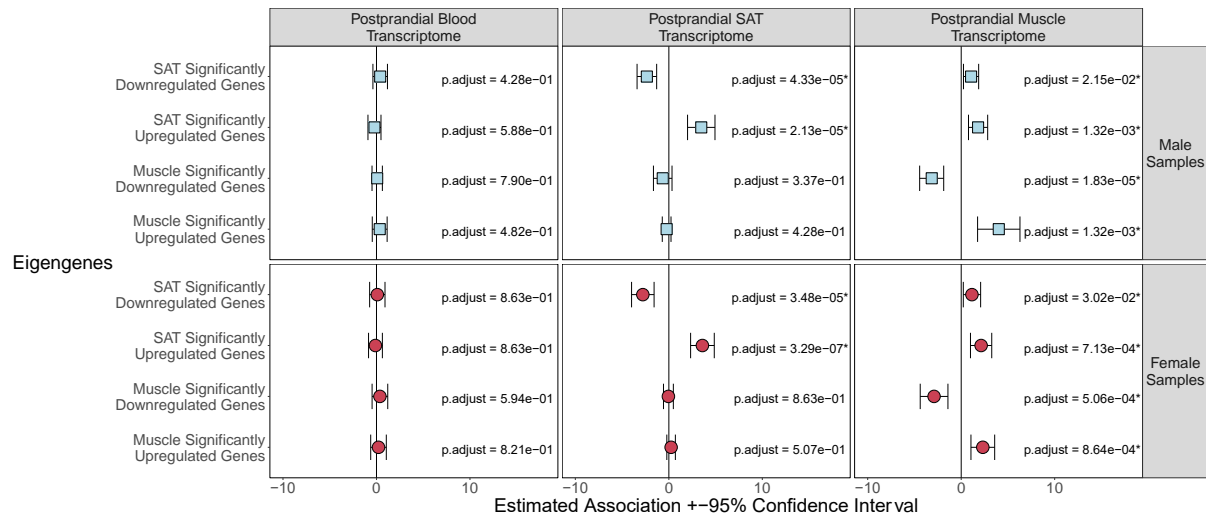

**Figure 3: Effect of the 13-week lifestyle intervention on Eigengenes calculated using up- or downregulated significantly differentially expressed genes.** Genes used for input of the eigengenes were plotted on the y-axis. Light blue squares represent male samples, dark red circles represent female samples. The estimated intervention effect is plotted on the x-axis. Brackets indicate the 95% confidence interval. The p-values were adjusted for multiple testing using the false discovery rate. Significance is indicated by the asterisks (\* =  $p.adjust < 0.05$ ; \*\* =  $p.adjust < 0.01$ , \*\*\* =  $p.adjust < 0.001$ ). Abbreviations: SAT; subcutaneous adipose tissue.

676

677

678

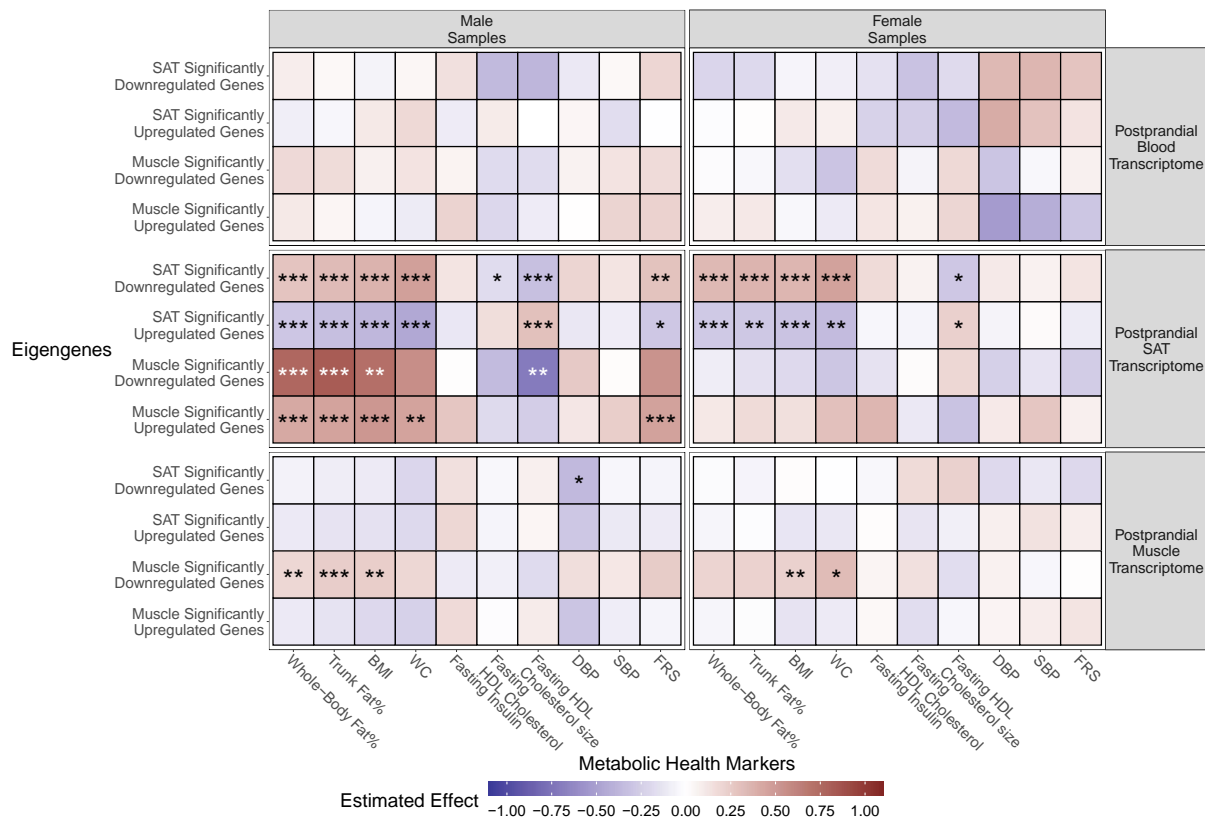

**Figure 4: The SAT postprandial transcriptome captures the metabolic health changes stronger than the blood and muscle transcriptome.** Genes used for input of the eigengenes were plotted on the y-axis. The metabolic health markers were plotted on the x-axis. Colors indicate the direction of the effect: blue, a negative effect, white; no effect, red; a positive effect, the darker the color, the stronger the effect. The p-values were adjusted for multiple testing using the false discovery rate. Significance is indicated by the asterisks (\* =  $p.adjust < 0.05$ ; \*\* =  $p.adjust < 0.01$ , \*\*\* =  $p.adjust < 0.001$ ). Abbreviations: SAT; subcutaneous adipose tissue.

679

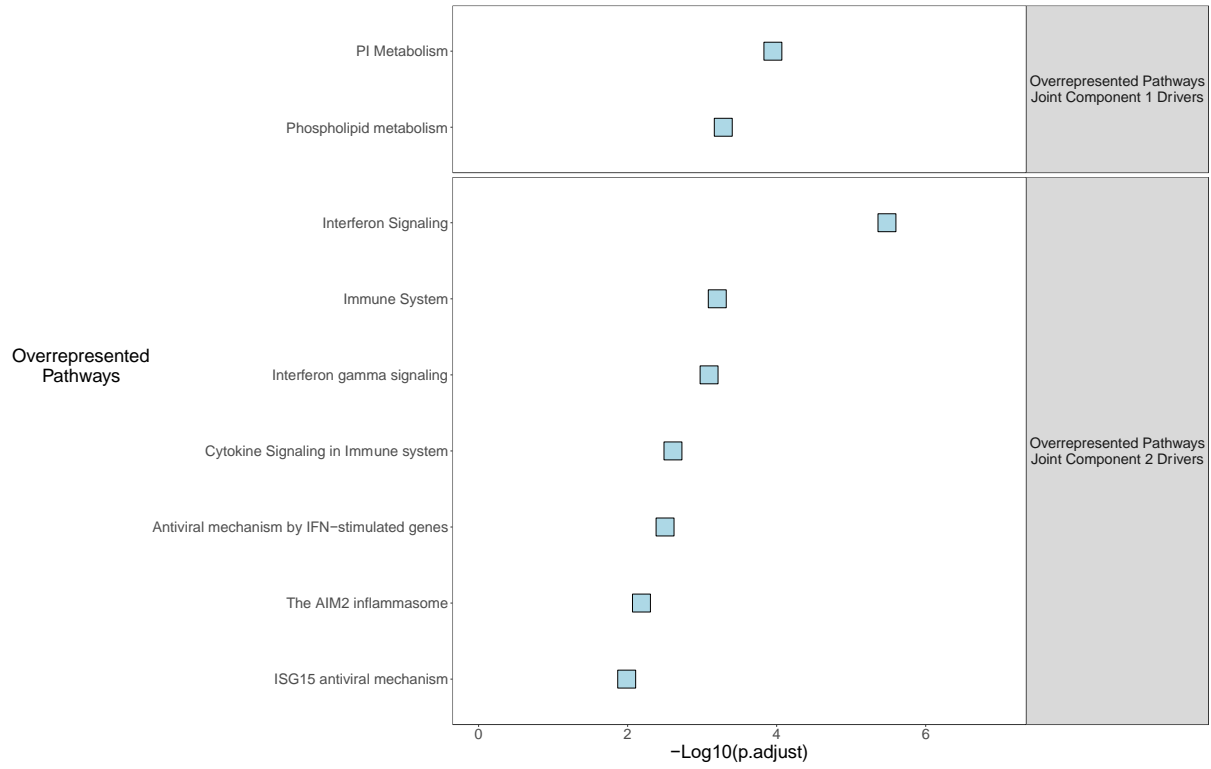

680

681

682

**Figure 5: Significantly Overrepresented pathways in the top 250 drivers of the postprandial blood joint effect.** The overrepresented pathways are plotted on the y-axis. Y-axis is ordered by significance, strongest significantly overrepresenting pathways first. The x-axis represents  $-\log_{10}$  of the Bonferroni adjusted significance p-value.

683

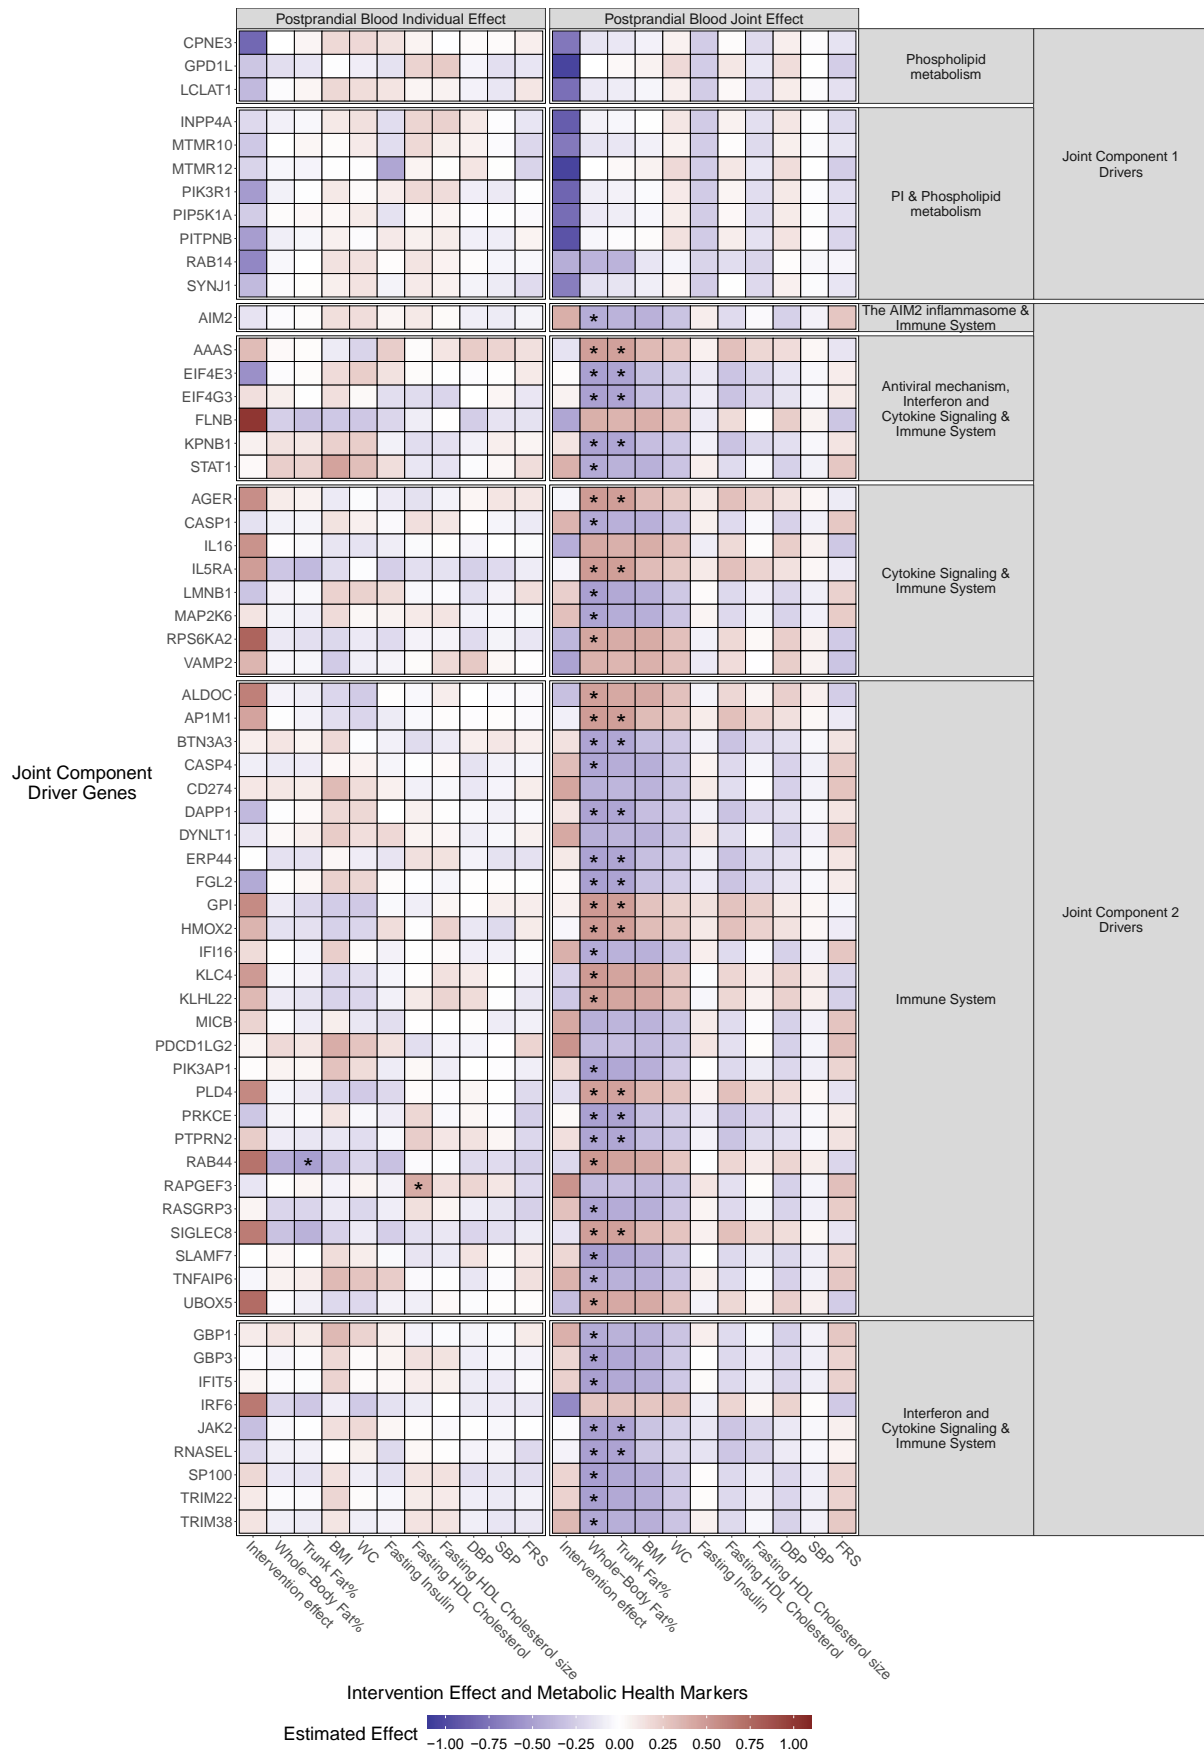

**Figure 6: In postprandial blood, the joint component 1 drivers strongly captured the intervention effect while joint component 2 drivers was significantly associated to whole-body fat% and trunk fat% levels. The genes were plotted on the y-axis, the intervention effect and metabolic health markers were plotted on the x-axis. Colors indicate the direction of the effect: blue, a negative effect, white; no effect, red; a positive effect, the darker the color, the stronger the effect. The p-values were adjusted using the false discovery rate. Significance is indicated by the asterisks (\* =  $p.adjust < 0.05$ ).**
